# Supplementary material
Source: PubMed Central journal article supplement (PMC6217924)
Supplement: NIHMS76725-supplement-Supplementary_Information.pdf [file NIHMS76725-supplement-Supplementary_Information.pdf]

## Full uncropped scans of Western blots

Figure 4a

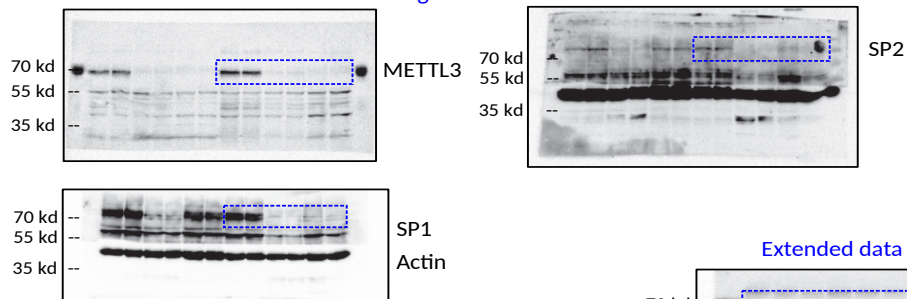

Extended data Fig. 3b

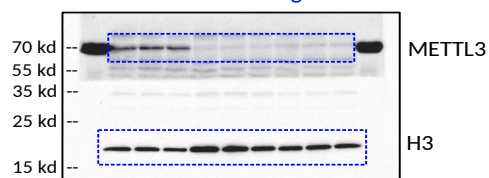

Extended data Fig. 3d

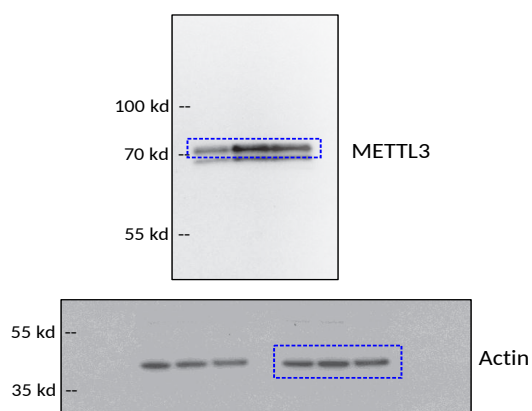

Extended data Fig. 4c

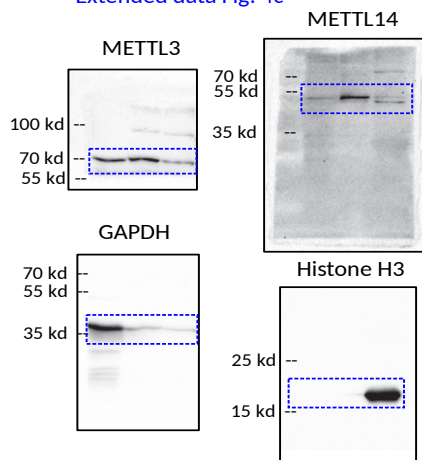

Extended data Fig. 10b

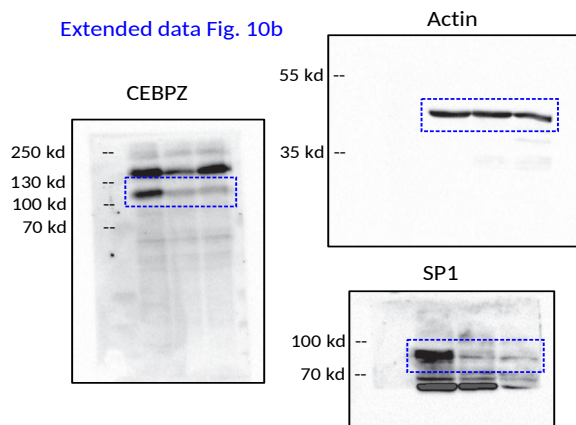

Extended data Fig. 10i

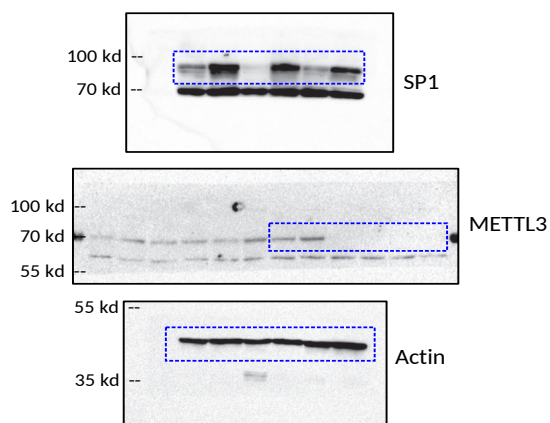

Example of gating strategy employed for flow cytometry experiments

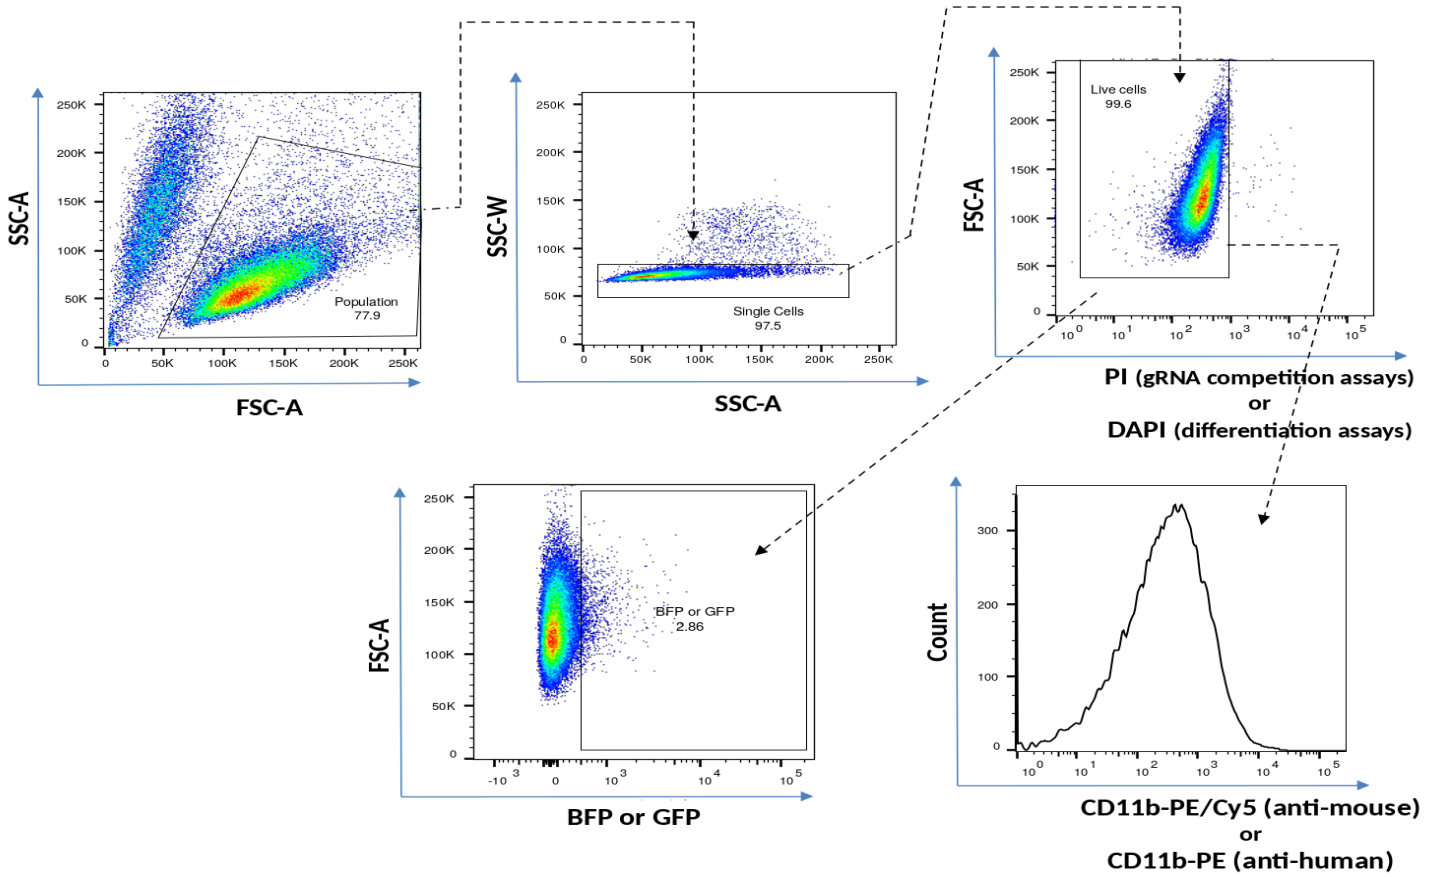

## PRIMERS AND SEQUENCES

| Targeted screen validation gRNAs |                       |
|----------------------------------|-----------------------|
| Mettl3_52297471_188.15           | TTCACATGGAGCTACCGTAT  |
| Mettl3_52296667_106.7            | CATCATTAGGACGGGCCGGA  |
| Mettl3_52297471_188.7            | CTGTTGTGATATCCGCTACC  |
| Mettl16_74795982_133.3           | CCTAGTTCTGTAAACACCGG  |
| Mettl16_74773522_128.5           | GATGCCAGATATGCGAAGTC  |
| Mettl16_74787555_141.1           | TTACTTGGAGCAACCTTAAA  |
| Mettl14_123374001_62.1           | TCGATGAGATTGCAGCACCT  |
| Mettl14_123374745_142.4          | ATTCTTCCAGAGGGGGCTCC  |
| Mettl14_123374745_142.11         | TCACTGCGAATGAGAAATGC  |
| Emg1_124704981_108.5             | ACTGGGAAGTGGTCGGACAC  |
| Emg1_124705515_142.0             | GAGGCCACAAAATCGGTCAA  |
| Emg1_124705741_102.7             | TTGAAGAATGGACGGGACCC  |
| Tgs1_3602147_144.0               | AAGATTGCTGAACACATTGC  |
| Tgs1_3598514_150.1               | TTCCAGAGCTGGCTAAATAC  |
| Tgs1_3602147_144.10              | ATGTGTTTCAGCAATCTTCTC |
| Mettl2_105128986_90.1            | CTCGGTCACCTAGAAATTAG  |
| Mettl2_105129013_63.0            | TCACCTAGAAATTAGTGGTG  |
| Mettl2_105131573_61.1            | CTTGAGCAGTTCAATAGCCG  |
| Rpa3_e1.1                        | ACGGGCCGGTCGATATACTG  |
| Rpa3_e1.2                        | GACCGGCCCGTGTGCTTCGT  |
| Rpa3_e1.3                        | GCTGGCGTTGACGCGCGCTT  |
| Rosa26                           | GAAGATGGGCGGGAGTCTTC  |

| <b>gRNA competition assay</b> |                       |
|-------------------------------|-----------------------|
| <b>Mouse gRNAs</b>            |                       |
| Mettl3_Exonic_A               | ACTCGGTCTCGCGACCCTG   |
| Mettl3_Exonic_B               | CCGCGATGGTTTCACAGCG   |
| Mettl3_Domain_A               | TTCACATGGAGCTACCGTAT  |
| Mettl3_Domain_B               | CATCATTAGGACGGGCCGGA  |
| Mettl16_Exonic_A              | GAAGATTTGATTGGTCACC   |
| Mettl16_Exonic_B              | ACAAACTACTCTCCGAAG    |
| Mettl16_Domain_A              | CCTAGTTCTGTAAACACCGG  |
| Mettl16_Domain_B              | GATGCCAGATATGCGAAGTC  |
| Sp1                           | GGGGCTACCCCTACCTCAA   |
| <b>Human gRNAs</b>            |                       |
| METTL3_Exonic_A               | GCAGGGTTCGATCAGCATCAC |
| METTL3_Exonic_B               | GAAATTTTCGCTCTCGAGGTC |
| METTL3_Domain_A               | GCTCAACATACCCGTACTAC  |
| METTL3_Domain_B               | CTGTTGTGATATCCGCTACC  |
| METTL16_Exonic_A              | GTCAAGGTCGGACAATGAGA  |
| METTL16_Exonic_B              | GGGAGGAGCTTCGCATACAA  |
| METTL16_Domain_A              | CTCCGAAGAGGAATTGACAT  |
| METTL16_Domain_B              | TCAGAGCTCTGACTGCTTCG  |
| METTL1_Exonic_A               | GGCTTTGTCCGCTTGAAATG  |
| METTL1_Exonic_B               | GGCCTGAGTGTTACCTAAC   |
| METTL14_Exonic_A              | GAGGGAGCTCATCAGGCTAA  |
| METTL14_Exonic_B              | GAGAGAAAAATAAATGATCG  |
| SP1                           | GAGGGCCCGAGTCAGTCAGG  |
| CEBPZ                         | GTACTTTGTCATCACCAGTC  |

| <b>TIDE</b>        |                           |                           |
|--------------------|---------------------------|---------------------------|
| <b>MOUSE</b>       | <b>Forward PCR primer</b> | <b>Reverse PCR primer</b> |
| <b>Mettl3_Dom1</b> | CAGAAGAGGCAGGCATCCTA      | TGACTCCAGTGCTGATCGAC      |
| <b>Mettl3_Dom2</b> | TTAGATGCACAGGGGACACA      | ATGGAATTGGGCAGAGAATG      |
|                    |                           |                           |
| <b>HUMAN</b>       | <b>Forward PCR primer</b> | <b>Reverse PCR primer</b> |
| <b>METTL3</b>      | CTGAGGCAGGAGAATTGCTT      | GGCAGCCATACACGTTAAGA      |
| <b>METTL16</b>     | GCTGAGCAAAAATCACTATGTTG   | AGAGCTGTGTTTTTCAGTGTTTCA  |
| <b>METTL1</b>      | TCTGTCTCTCTTGCCGTTCTG     | AGGTGCCTAGATGTCCCACAAC    |
| <b>METTL14</b>     | TCTGCAACCACTGACTGAGGAA    | CCAGGAGTGATGGCTGAAATGC    |
|                    |                           |                           |
| <b>MOUSE</b>       | <b>Forward Seq primer</b> | <b>Reverse Seq primer</b> |
| <b>Mettl3_Dom1</b> | CACTCTGCTGTATTTCCCATACC   | TGAAAGAAGGAAAGATGACCAAA   |
| <b>Mettl3_Dom2</b> | CCCTCTTCTCCTGTTTCTC       | CCAATCTGCCCTTGTGTCTT      |
|                    |                           |                           |
| <b>HUMAN</b>       | <b>Forward Seq primer</b> | <b>Reverse Seq primer</b> |
| <b>METTL3</b>      | CCCAGGATTTTATCTCCATT      | AGGGAAGATGACCAAATACCA     |
| <b>METTL16</b>     | TCTCCAGGACCAGCCTTCTA      | TGCAGTTTGTGATGAGATGCTGT   |
| <b>METTL1</b>      | TGTCTCCGTAGCAATGCCATGA    | CAACGTCAGCAGCCAGATGAAG    |
| <b>METTL14</b>     | TCTGGGTTTTTACTTGTCATGTCA  | AGCATGTTAACATAAGTGCTGA    |

| <b>shRNA sequences</b> |                                                         |
|------------------------|---------------------------------------------------------|
| METTL3 sh1             | CGTCAGTATCTTGGGCAAGTTCTCGAGAACTTGCCCAAGATACTGACGTTTTTG  |
| METTL3 sh2             | GCTGCACTTCAGACGAATTATCTCGAGATAATTCGTCTGAAGTGCAGCTTTTTG  |
| CEBPZ sh1              | GATCGATTTGTATACCGAAATCTCGAGATTTTCGGTATACAAATCGATCTTTTTG |
| CEBPZ sh4              | AGGCTACTCTTCCGCTCAAATCTCGAGATTTGAGCGGAAGAGTAGCCTTTTTTG  |
| CTRL sh                | CAACAAGATGAAGAGCACCAACTCGAGTTGGTGCTCTTCATCTTGTTGTTTTTG  |

| <b>Cloning primers</b> |                                             |
|------------------------|---------------------------------------------|
| gibSP2_fw              | GCCAAAACATTAAGAAGGGCCCGATTTCAGGGGTCACTGAGCG |
| gibSP2_rv              | GAATGGCGCTGGGCCGGCCTTGGGGGAC                |
| gibSP1_cDNA_fw         | GACGTTAACCATGAGCGACCAAGATCACTCCA            |
| gibSP1_cDNA_rv         | GTGCGTAACTCAGAAGCCATTGCCACTGATATTAATGG      |

| <b>METTL3 mutagenesis (DW/AA mutant)</b> |                                              |
|------------------------------------------|----------------------------------------------|
| Fwd                                      | AGTTGTGATGGCTGCCCCACCCGCGGATATTCACATGGAAGCTG |
| Rev                                      | CAGTCCATGTGAATATCCGCGGGTGGGGCAGCCATCACAACT   |

| <b>Luciferase promoter sequences</b> |                                                                                                                                                                                                                                                                                                |
|--------------------------------------|------------------------------------------------------------------------------------------------------------------------------------------------------------------------------------------------------------------------------------------------------------------------------------------------|
| 10XUAS                               | AGATCTGCCAAGGCGGAGTACTGTCCTCCGGGCTGGCGGAGTACTGT<br>CCTCCGGCAAGGTCGGAGTACTGTCCTCCGACACTAGAGGTCGGAGT<br>ACTGTCCTCCGACGCAAGGCGGAGTACTGTCCTCCGGGCTGGCGGAGT<br>ACTGTCCTCCGGCAAGGTCGGAGTACTGTCCTCCGACACTAGAGGTCG<br>GAGTACTGTCCTCCGACGCAAGGCGGAGTACTGTCCTCCGGGCTGGCG<br>GAGTACTGTCCTCCGGACGCGTAGATCT |
| SCRAMBLED_10XUAS                     | AGATCTGCCAAGGTCAGGCCCTGTCCTAGGGGCTGGTCAGGCCCTGTC<br>CTAGGGCAAGGTTCAAGGCCCTGTCCTAGGACACTAGAGGTTCAAGGCC<br>TGTCTAGGACGCAAGGTCAGGCCCTGTCCTAGGGGCTGTCAGGCCCT<br>GTCCTAGGGCAAGGTTCAAGGCCCTGTCCTAGGACACTAGAGGTTCAAG<br>CCCTGTCCTAGGACGCAAGGTCAGGCCCTGTCCTAGGGGCTGGTCAGG<br>CCCTGTCCTAGGGACGCGTAGATCT |

| <b>ChIP-qPCR</b> | <b>FWD</b>            | <b>REV</b>           |
|------------------|-----------------------|----------------------|
| SP1 tss          | TGCGTCCTTTCTGTCTCTT   | AACCAATCAGAAATCAGGCG |
| EVI5L tss        | CTCGTTATTGGGCAGAAAGC  | ATAGCAAGGAAAGTGGGGGT |
| LRCH4 tss        | CACCCAATCACAATGCTCAG  | CCGTTTTCTGCTAGTGGAG  |
| RFX1tss          | TGGGAGTTGTAGTCCGCTCT  | GGAGTCTTCTTTCTCGCCT  |
| SP2 tss          | ATTCAATTGGCTTTTCGGTTG | AGAGCGACGTTGATTTGACC |
| LMO2 tss         | AAGGACCGAGAAGGAGAGG   | GAGCAGGCACGAGGAGAG   |
| HNRNPL tss       | CACCAGTCACAATGACGACC  | CAATCAGTGGAGACGCAGAA |

| <b>RT-PCR<br/>Taqman</b> | <b>FWD</b>                  | <b>REV</b>                 | <b>Probe</b> |
|--------------------------|-----------------------------|----------------------------|--------------|
| METTL3                   | CGTACTACAGGATGATGGCTTTC     | TTTCATCTACCCGTTTCATACCC    | 6            |
| $\beta$ -ACTIN           | CCAACCGCGAGAAGATGA          | CCAGAGGCGTACAGGGATAG       | 64           |
| DICER1                   | CTTAAAGTTGTTAGTGAGTGGAATGAA | CTGTTATCTATCCTGTTATCAACCAA | 8            |
| GAPDH                    | TCCACTGGCGTCTTCACC          | GGCAGAGATGATGACCCTTTT      | 45           |
| HNRNPL                   | TCCCCAGTTGTCCACATCA         | CAAGGCCTCCACAAGGTCT        | 31           |
| SP1                      | CAGTGGGCTACAGGGGTCT         | CTTGCAATGAGCCTCCAGAT       | 42           |
| SP2                      | CTTGTGAACGCCAGTGACA         | AGTCTTAGACAGCGGGTTG        | 17           |
| CEBPZ                    | ATAATACTAGTGAAGCCGAGAATGG   | GCCAGCATAAGGTAATCTTGCT     | 69           |

| <b>RT-PCR sybr green</b> | <b>FWD</b>           | <b>REV</b>           |
|--------------------------|----------------------|----------------------|
| Firefly Luciferase       | GGCCTGACAGAAACAACCAG | AAGTCCACCACCTTAGCCTC |
| Renilla Luciferase       | CGCTATTGTCGAGGGAGCTA | GCTCCACGAAGCTCTTGATG |
